# Supplementary material for: Methamphetamine induces cardiomyopathy by Sigmar1 inhibition-dependent impairment of mitochondrial dynamics and function
Source: PubMed Central journal article supplement (PMC7673131; doi:10.1038/s42003-020-01408-z), 2020-11-17

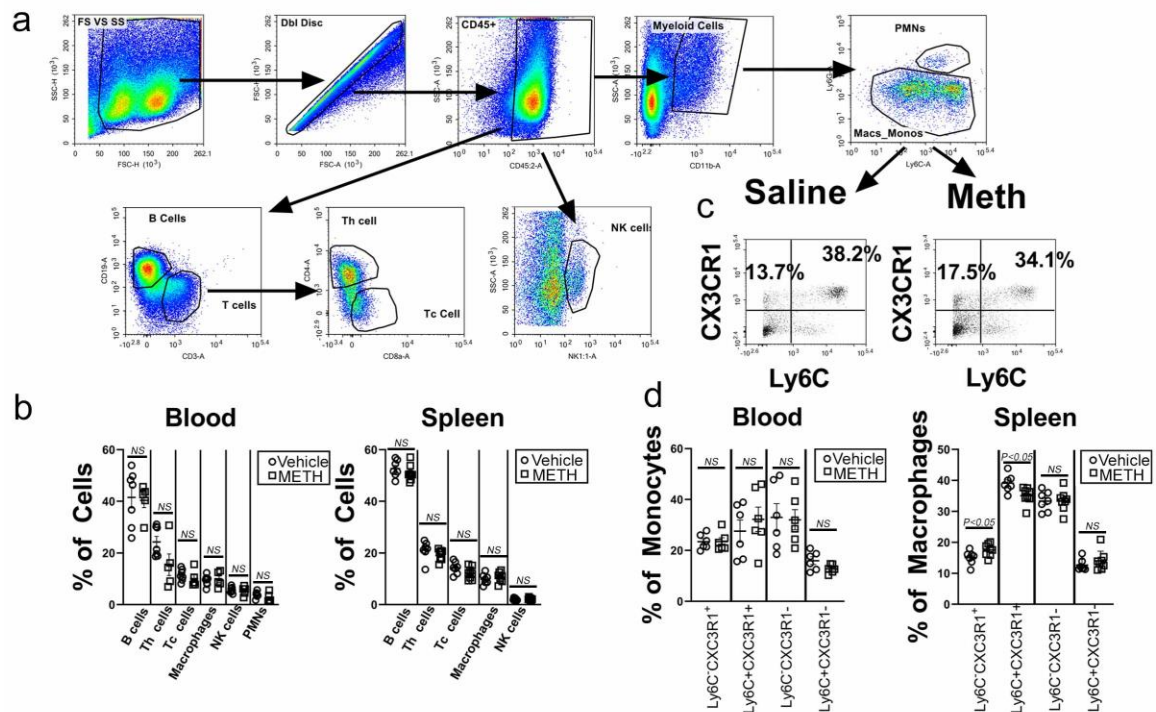

**Supplementary Figure 1. Immunophenotyping in systemic circulation and secondary lymphoid organ spleen of Vehicle and METH treated mice.** **a** Immune cells were analyzed through flow cytometry in live single-cell suspensions from blood and splenocytes. Representative forward and side scatter profiles showing gating strategy used to quantify the percent of immune cell populations in blood and spleen. **b** Left panel, bar graphs represent percent population of B cells (CD45<sup>+</sup>CD19<sup>+</sup>), Th cells (CD45<sup>+</sup>CD19<sup>-</sup>CD3<sup>+</sup>CD4<sup>+</sup>), Tc cells (CD45<sup>+</sup>CD19<sup>-</sup>CD3<sup>+</sup>CD8<sup>+</sup>), macrophages (CD45<sup>+</sup>CD11b<sup>+</sup>Ly6G<sup>-</sup>Ly6C<sup>+</sup>), natural killer (NK) cells (CD45<sup>+</sup>NK1.1<sup>+</sup>), and polymorphonuclear cells (PMNs) (CD45<sup>+</sup>CD11b<sup>+</sup>Ly6G<sup>+</sup>Ly6C<sup>+</sup>) in the blood of vehicle (n=6-7) and METH (n=5) treated mice. Right panel, bar graph represents the number of B Cells, Th cells, Tc cells, macrophages, and NK cells in spleen expressed as a percent of total splenocytes population in the vehicle (n=7) and METH (n=8) treated mice. **c-d** Bar graphs represent CD45<sup>+</sup>CD11b<sup>+</sup>Ly6G<sup>-</sup>Ly6C<sup>+</sup>CX3Cr1<sup>-</sup> and CD45<sup>+</sup>CD11b<sup>+</sup>Ly6G<sup>-</sup>Ly6C<sup>+</sup>CX3Cr1<sup>+</sup> monocytes expressed as a percent of total monocytes in the blood (n=6 mice per group) and spleen in the vehicle (n=7) and METH (n=8) treated mice, respectively. Data are expressed as mean ± SEM. *P* values were determined by two-tailed unpaired Student's t-test. A *P* value of less than 0.05 between groups considered statistically significant. METH, methamphetamine.

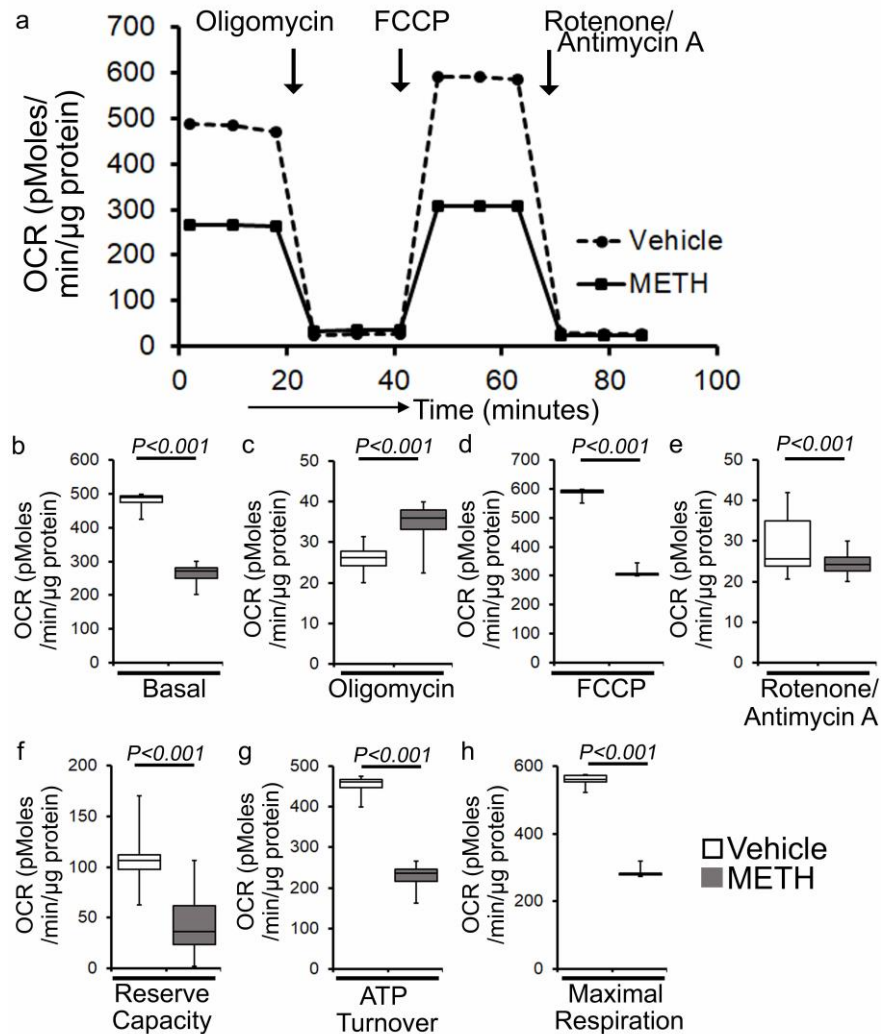

**Supplementary Figure 2. METH treatment attenuates mitochondrial respiratory parameters in cardiac mitochondria.** **a** Summary traces of mitochondrial oxygen consumption rate (OCR) values measured in isolated cardiac mitochondria from Vehicle and METH treated mice post-2-weeks of treatment. Black arrow indicates the sequential addition of oligomycin (1  $\mu\text{mol/L}$ ), carbonyl cyanide 4-(trifluoromethoxy) phenylhydrazone (FCCP) (4  $\mu\text{mol/L}$ ), and rotenone (0.5  $\mu\text{mol/L}$ ) plus antimycin A (0.5  $\mu\text{mol/L}$ ). OCR values are expressed as picomoles of  $\text{O}_2$ /[min $\cdot\mu\text{g}$  protein], and each point represents average OCR values from 6 individual mice per group. **b-e** Bar graphs represent OCR under (b) baseline as well as with the addition of (c) oligomycin, (d) FCCP, and (e) rotenone plus antimycin A. **f-h** Key parameters of mitochondrial bioenergetics, including (f) reserve capacity, (g) ATP turnover, and (h) maximal respiration, were significantly decreased in METH treated mice heart mitochondria compared to vehicle-treated group. Boxes depict interquartile ranges, lines represent medians, and whiskers represent ranges.  $P$  values were determined by Tukey's pairwise multiple comparisons test. A  $P$  value of less than 0.05 between groups considered statistically significant. Veh, vehicle; METH, methamphetamine.

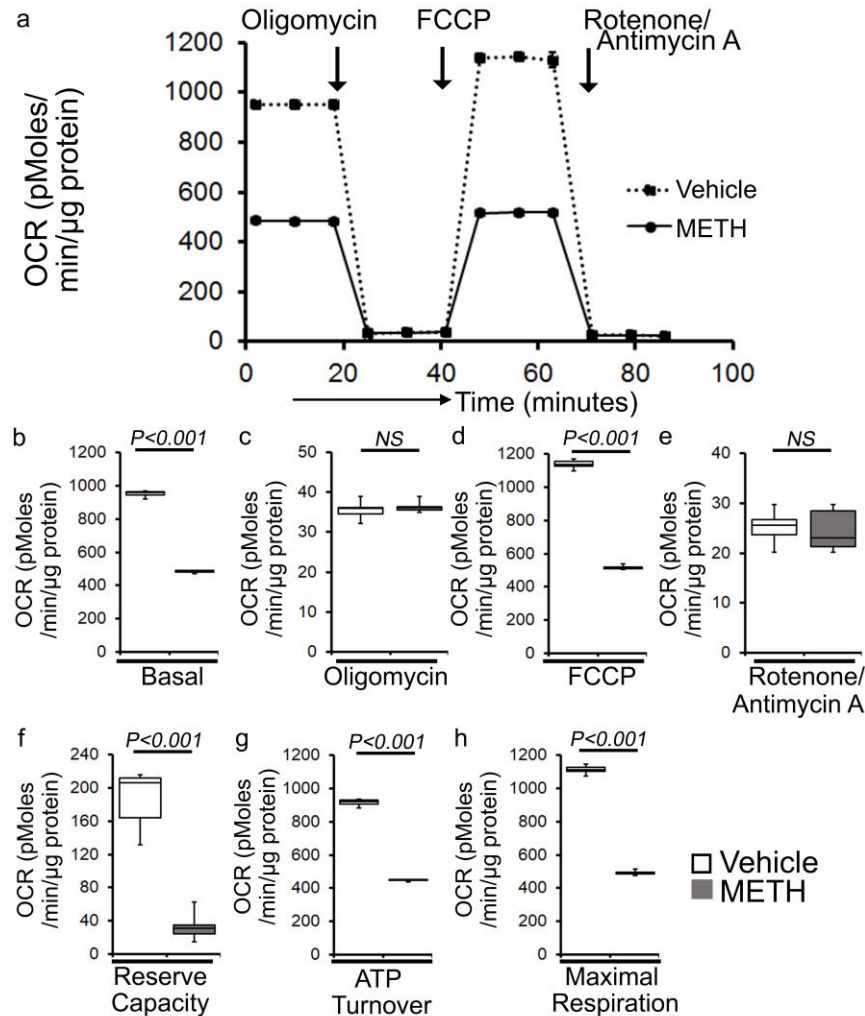

**Supplementary Figure 3. METH induces suppression of mitochondrial respiration in cultured cardiomyocytes.** **a** Summary traces of mitochondrial oxygen consumption rate (OCR) profiles measured in cultured neonatal rat cardiomyocytes (NRC) following treatment with vehicle or METH (100  $\mu$ M) for 24 hours. The black arrow indicates the sequential addition of oligomycin (1  $\mu$ mol/L), carbonyl cyanide 4-(trifluoromethoxy) phenylhydrazone (FCCP) (4  $\mu$ mol/L), and rotenone (0.5  $\mu$ mol/L) plus antimycin A (0.5  $\mu$ mol/L). OCR profiles are expressed as pmol O<sub>2</sub>/[min\* $\mu$ g protein], and each point represents average OCR values from 5 wells per group. **b-e** Bar graphs represent OCR under **(b)** baseline and with the addition of **(c)** oligomycin, **(d)** FCCP, and **(e)** rotenone plus antimycin A. **(f-h)** Key parameters of mitochondrial bioenergetics, including **(f)** reserve capacity, **(g)** ATP turnover, and **(h)** maximal respiration, were significantly decreased in METH-treated cardiomyocytes compared to those of the vehicle-treated group. Boxes depict interquartile ranges, lines represent medians, and whiskers represent ranges. *P* values were determined by Tukey's pairwise multiple comparisons test. *P*<0.05 between groups was considered statistically significant. Veh, vehicle; METH, methamphetamine.

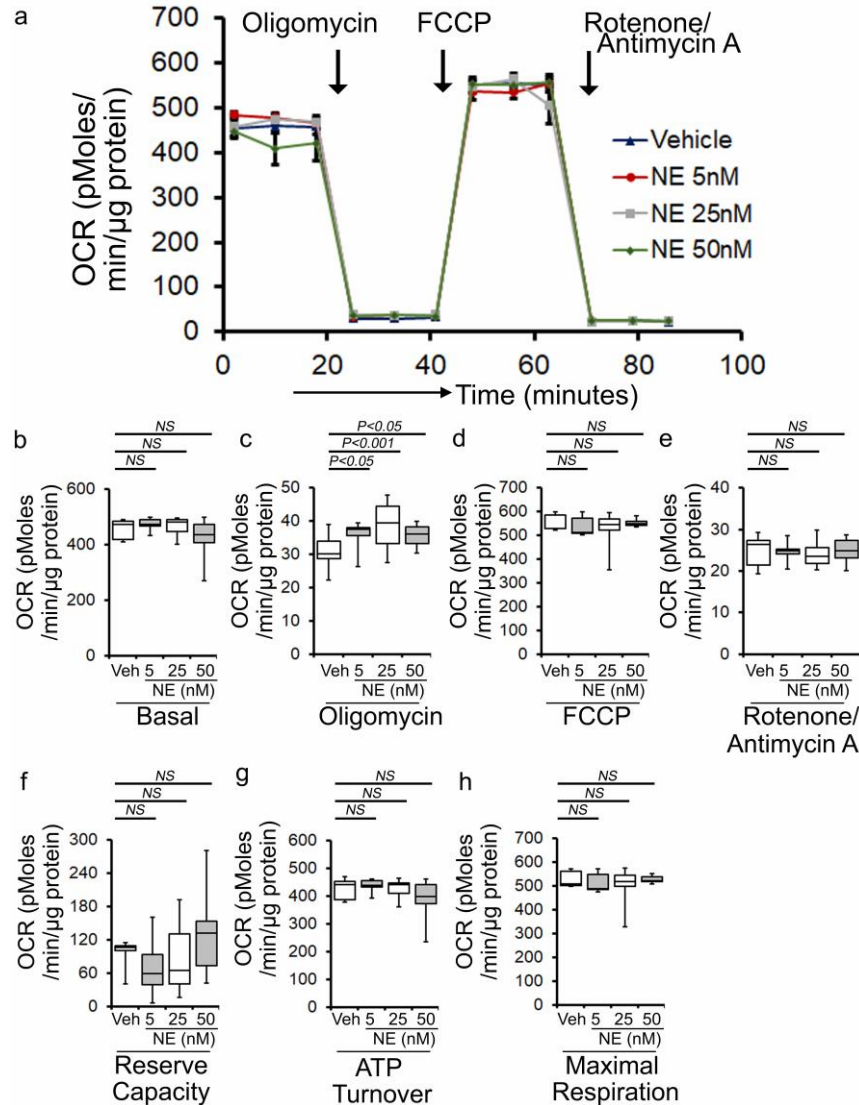

**Supplementary Figure 4. Mitochondrial respiratory parameters in norepinephrine treated cultured cardiomyocytes.** **a** Summary traces of mitochondrial oxygen consumption rate (OCR) profiles measured in cultured neonatal rat cardiomyocytes (NRCs) following treatment with vehicle (media only) and norepinephrine (NE) (5 nM, 25 nM and 50 nM) for 24 hours. Black arrow indicates the sequential addition of oligomycin (1 μmol/L), carbonyl cyanide 4-(trifluoromethoxy) phenylhydrazone (FCCP) (4 μmol/L), and rotenone (0.5 μmol/L) plus antimycin A (0.5 μmol/L). OCR profiles are expressed as picomoles of O<sub>2</sub>/[min\*μg protein], and each point represents average OCR values from 5 wells per group. **b-e** Bar graphs represent OCR under **(b)** baseline as well as with the addition of **(c)** oligomycin, **(d)** FCCP, and **(e)** rotenone plus antimycin A. **f-h** Key parameters of mitochondrial bioenergetics, including **(f)** reserve capacity, **(g)** ATP turnover, and **(h)** maximal respiration, were significantly decreased in METH treated cardiomyocytes compared to vehicle-treated group. Boxes depict interquartile ranges, lines represent medians, and whiskers represent ranges. *P* values were determined by one-way ANOVA followed by Tukey's pairwise multiple comparisons test. A *P* value of less than 0.05 between groups considered statistically significant. Veh, vehicle; METH, methamphetamine.

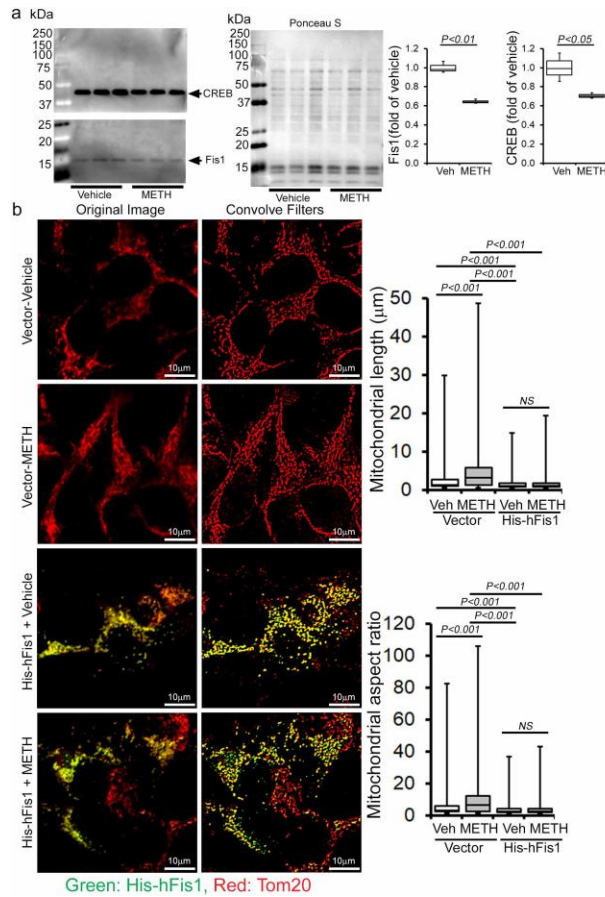

**Supplementary Figure 5. Fis1 overexpression preserved METH-induced altered mitochondrial morphology.** **a** Left panel, representative western blot images of CREB, and Fis1 expression following 24 hours of saline (vehicle) and METH (100  $\mu\text{M}$ ) treatment to HEK293T cells in triplicates. Right panel, bar graphs of Western blot lanes quantification showing METH reduces Fis1 and CREB proteins level in HEK293T cells. **b** Left panel, representative confocal microscope, and corresponding convolved images of Tom20 (in red to stain mitochondria) and His-tag (in green to stain exogenously overexpressed human Fis1 plasmid) stained HEK293T cells. Respective convolved images were used to analyze mitochondrial morphometric parameters (length and width) in vector-vehicle (6871 mitochondrial networks in 200 cells), vector-METH (2943 mitochondrial networks in 242 cells), His-hFis1+vehicle (4385 mitochondrial networks in 204 cells) and His-hFis1+METH (3831 mitochondrial networks in 201 cells) groups of HEK293T cells from three independent experiments. Right panel, bar graphs of measured mitochondrial length ( $\mu\text{m}$ ) and mitochondrial aspect ratio (length-to-width ratio) confirming His-hFis1 overexpression induces mitochondrial fragmentation as evident in reduced mitochondrial length and aspect ratio. Moreover, His-hFis1 overexpression preserved METH-induced mitochondrial networks length elongation compared to vehicle only treated cells. Vehicle and METH group cells were transfected only with an empty vector plasmid. Boxes depict interquartile ranges, lines represent medians, and whiskers represent ranges.  $P$  values were determined by one-way ANOVA followed by Tukey's multiple comparisons test. A  $P$  value of less than 0.05 between groups considered statistically significant. Veh, vehicle; METH, methamphetamine; His-hFis1, N-terminal His-tagged human Fis1.

| Sample ID | Cause of Death                             | Age & Sex | Heart Wt. | Body Wt. | BMI  | Height | Race |
|-----------|--------------------------------------------|-----------|-----------|----------|------|--------|------|
| METH-1    | Stab wound                                 | 51y M     | 520 g     | 216 lbs  | 32.4 | 5'8"   | C    |
| METH-2    | Acute cardiovascular disease               | 54y M     | 570 g     | 198 lbs  | 32   | 5'6"   | C    |
| METH-3    | Cocaine/Methamphetamine toxicity           | 55y M     | 470 g     | 210 lbs  | 29.3 | 5'11"  | AA   |
| METH-4    | Hanging (suicide)                          | 26y M     | 460 g     | 211 lbs  | 29.4 | 5'11"  | C    |
| METH-5    | Combined drug overdose                     | 45y M     | 450 g     | 187 lbs  | 24.7 | 6'1"   | C    |
| METH-6    | Combined drug overdose                     | 50y F     | 320 g     | 139 lbs  | 27.1 | 5'0"   | C    |
| METH-7    | Chronic myocardial infarction              | 30y F     | 365 g     | 198 lbs  | 31   | 5'7"   | C    |
| METH-8    | Methamphetamine toxicity                   | 20y F     | 270 g     | 124 lbs  | 21.3 | 5'4"   | C    |
| METH-9    | Gunshot wound                              | 31y M     | 310 g     | 154 lbs  | 21.5 | 5'11"  | C    |
| METH-10   | Gunshot wound                              | 28y M     | 340 g     | 167 lbs  | 22   | 6'3"   | AA   |
| METH-11   | Methamphetamine toxicity                   | 20y M     | 305 g     | 180 lbs  | 25.8 | 5'10"  | C    |
| METH-12   | Gunshot wound                              | 23y F     | 290 g     | 171 lbs  | 26.8 | 5'7"   | C    |
| METH-13   | Stab wound                                 | 34y M     | 390 g     | 160 lbs  | 26.6 | 5'5"   | C    |
| METH-14   | Blunt force injuries                       | 34y M     | 320 g     | 182 lbs  | 30.3 | 5'5"   | C    |
| METH-15   | Pulmonary emboli                           | 50y M     | 430 g     | 228 lbs  | 30.1 | 6'1"   | C    |
| METH-16   | Pulmonary emboli                           | 36y F     | 500 g     | 331 lbs  | 51.8 | 5'7"   | C    |
| METH-17   | Blunt force injuries                       | 34y M     | 390 g     | 172 lbs  | 26.9 | 5'7"   | C    |
| METH-18   | Blunt force injuries                       | 28y F     | 360 g     | 205 lbs  | 30.3 | 5'9"   | C    |
| METH-19   | Hanging (suicide)                          | 28y M     | 370 g     | 157 lbs  | 21.9 | 5'11"  | C    |
| METH-20   | Gunshot wound                              | 45y M     | 510 g     | 291 lbs  | 41.7 | 5'10"  | AA   |
| METH-21   | Methamphetamine toxicity                   | 63y M     | 500 g     | 161 lbs  | 23.8 | 5'9"   | C    |
| METH-22   | Gunshot wound                              | 49y M     | 430 g     | 226 lbs  | 30.6 | 6'0"   | C    |
| METH-23   | Gunshot wound                              | 29y M     | 410 g     | 199 lbs  | 29.4 | 5'9"   | AA   |
| METH-24   | Gunshot wound                              | 45y M     | 400 g     | 173 lbs  | 27.1 | 5'7"   | AA   |
| METH-25   | Gunshot wound                              | 55y M     | 340 g     | 162 lbs  | 26.1 | 5'6"   | C    |
| METH-26   | Gunshot wound                              | 48y M     | 500 g     | 144 lbs  | 20.1 | 5'11"  | C    |
| METH-27   | Blunt force injuries                       | 33y M     | 400 g     | 221 lbs  | 30.8 | 5'11"  | C    |
| METH-28   | Methamphetamine intoxication               | 36y M     | 350 g     | 167 lbs  | 24   | 5'10"  | AA   |
| METH-29   | Gunshot wound                              | 30y M     | 430 g     | 170 lbs  | 26.6 | 5'7"   | AA   |
| METH-30   | Methamphetamine intoxication               | 45y M     | 560 g     | 176 lbs  | 26   | 5'9"   | C    |
| METH-31   | Methamphetamine toxicity                   | 46y M     | 360 g     | 128 lbs  | 20   | 5'7"   | C    |
| METH-32   | Gunshot wound (hypertension and alcoholic) | 38y M     | 510 g     | 216 lbs  | 30.1 | 5'11"  | C    |
| METH-33   | Hypertensive cardiovascular disease        | 41y M     | 715 g     | 278 lbs  | 38.8 | 5'11"  | C    |
| METH-34   | Gunshot to head (alcoholic)                | 23y F     | 200 g     | 116 lbs  | 20.5 | 5'3"   | AA   |

|           |                                                   |       |       |         |      |       |    |
|-----------|---------------------------------------------------|-------|-------|---------|------|-------|----|
| Control-1 | Gunshot wound - Control Heart                     | 32y M | 395 g | 248 lbs | 35.6 | 5'10" | AA |
| Control-2 | Hanging - Control Heart                           | 36y M | 250 g | 122 lbs | 18.5 | 5'8"  | C  |
| Control-3 | Motor vehicle collision (MVC) - Control Heart     | 34y F | 270 g | 114 lbs | 17.1 | 5'9"  | AA |
| Control-4 | Bilateral pulmonary thromboemboli - Control Heart | 28y F | 300 g | 189 lbs | 29.6 | 5'7"  | AA |
| Control-5 | Hanging (suicide) - Control Heart                 | 18y F | 290 g | 108 lbs | 18.5 | 5'4"  | C  |
| Control-6 | Blunt force injuries - Control Heart              | 19y F | 235 g | 129 lbs | 21.5 | 5'5"  | C  |
| Control-7 | Gunshot wound - Control Heart                     | 29y M | 330 g | 148 lbs | 21.2 | 5'11" | AA |

AA = African American, C = Caucasian

**Supplementary Table 1: METH user and non-METH user patient demographics and physiological data**

| Day | Time  |       |      |      |
|-----|-------|-------|------|------|
|     | 10 am | 12 pm | 2 pm | 4 pm |
| 1   | 0     | 0     | 0    | 0    |
| 2   | 1     | 1     | 2    | 2    |
| 3   | 3     | 3     | 4    | 4    |
| 4   | 5     | 5     | 5    | 5    |
| 5   | 6     | 6     | 6    | 6    |
| 6   | --    | --    | --   | --   |
| 7   | --    | --    | --   | --   |
| 8   | 0     | 0     | 0    | 0    |
| 9   | 3     | 3     | 4    | 4    |
| 10  | 5     | 5     | 5    | 5    |
| 11  | 6     | 6     | 6    | 6    |
| 12  | 6     | 6     | 6    | 6    |
| 13  | --    | --    | --   | --   |
| 14  | --    | --    | --   | --   |
| 15  | 0     | 0     | 0    | 0    |
| 16  | 3     | 3     | 4    | 4    |
| 17  | 5     | 5     | 5    | 5    |
| 18  | 6     | 6     | 6    | 6    |
| 19  | 6     | 6     | 6    | 6    |
| 20  | --    | --    | --   | --   |
| 21  | --    | --    | --   | --   |
| 22  | 0     | 0     | 0    | 0    |
| 23  | 3     | 3     | 4    | 4    |
| 24  | 5     | 5     | 5    | 5    |
| 25  | 6     | 6     | 6    | 6    |
| 26  | 6     | 6     | 6    | 6    |

**Supplementary Table 2: Scheme for ‘binge and crash’ METH administration in mice.**

The dose of METH was escalated throughout the first cycle, which occurred during the first week of injections (days 1 through 5), followed by 3 weeks of repeated cycles of METH injections (days 8-12, 15-19, and 22-26) as shown in the table above. Mice received four injections per day two hours apart. The mice were injected at 10 am, 12 pm, 2 pm, and 4 pm with doses of METH including 0, 1, 2, 3, 4, 5, and 6 mg per kg body weight subcutaneously. Vehicle-treated mice received saline (0.9% w/v NaCl) in a scheme similar to that of METH treatment.

Uncropped Western Blots

Figure 5c

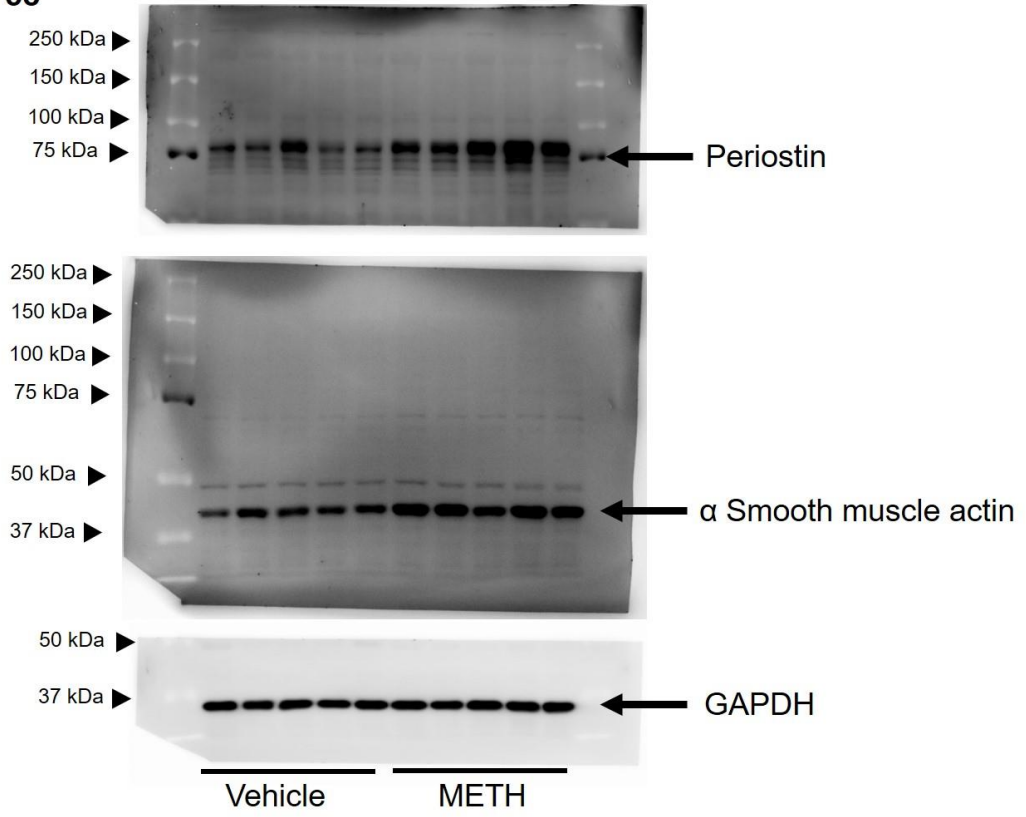



**Figure 6a**

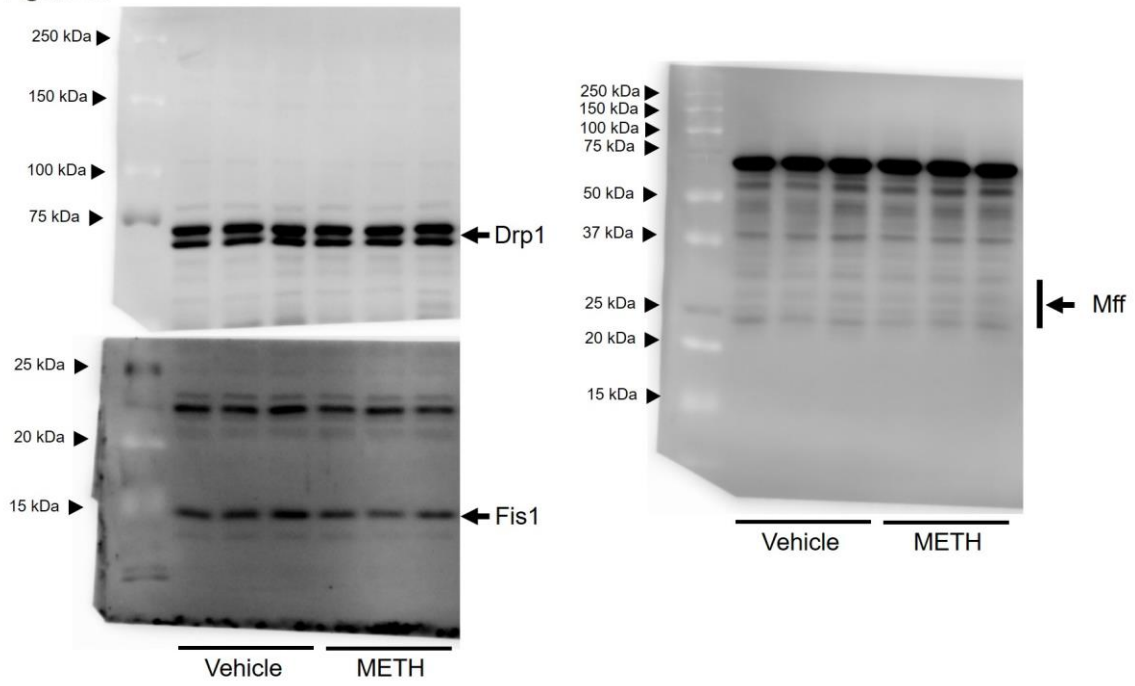

**Figure 6a**

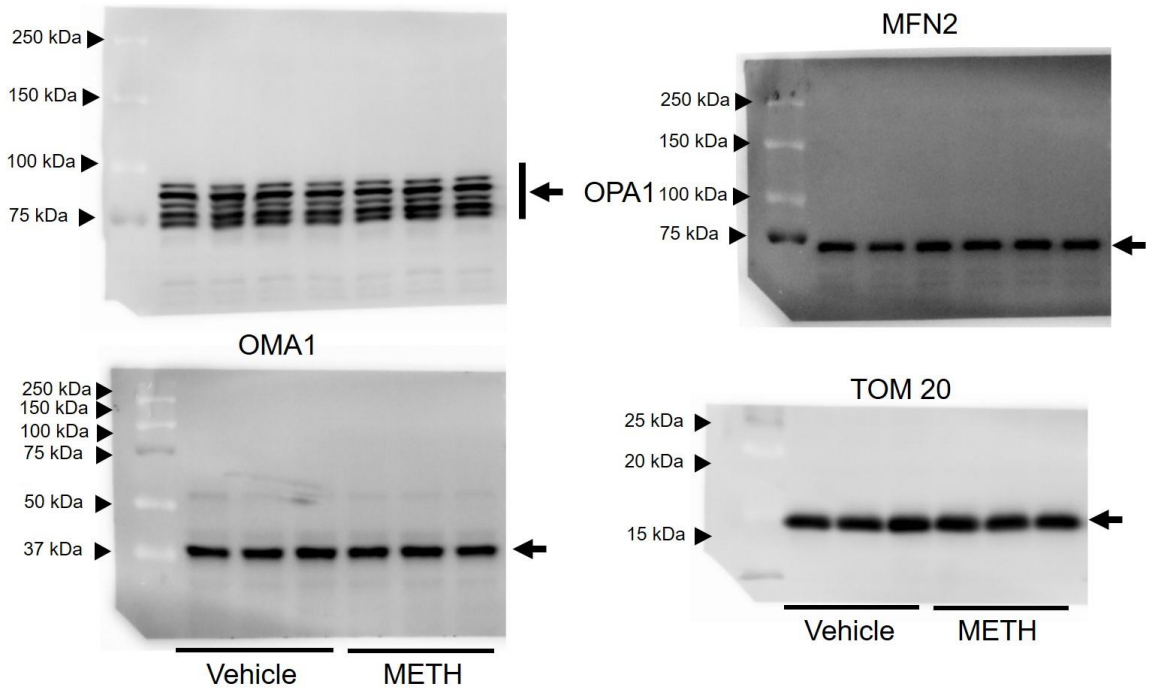

**Figure 6a**

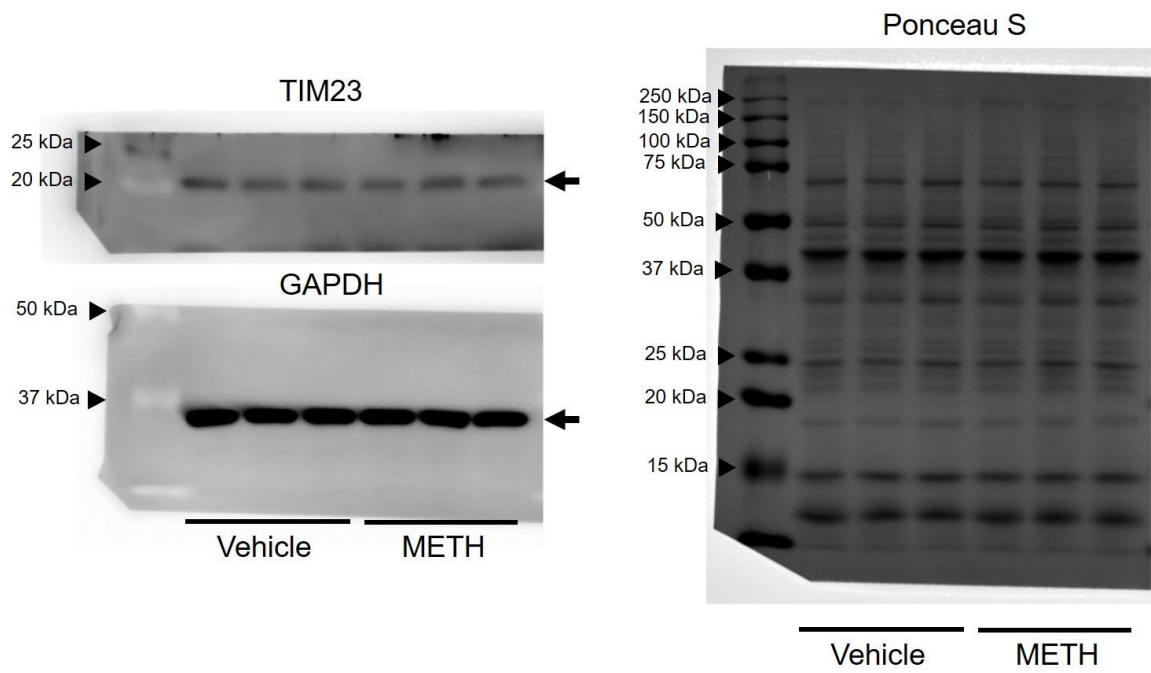

**Figure 6b**

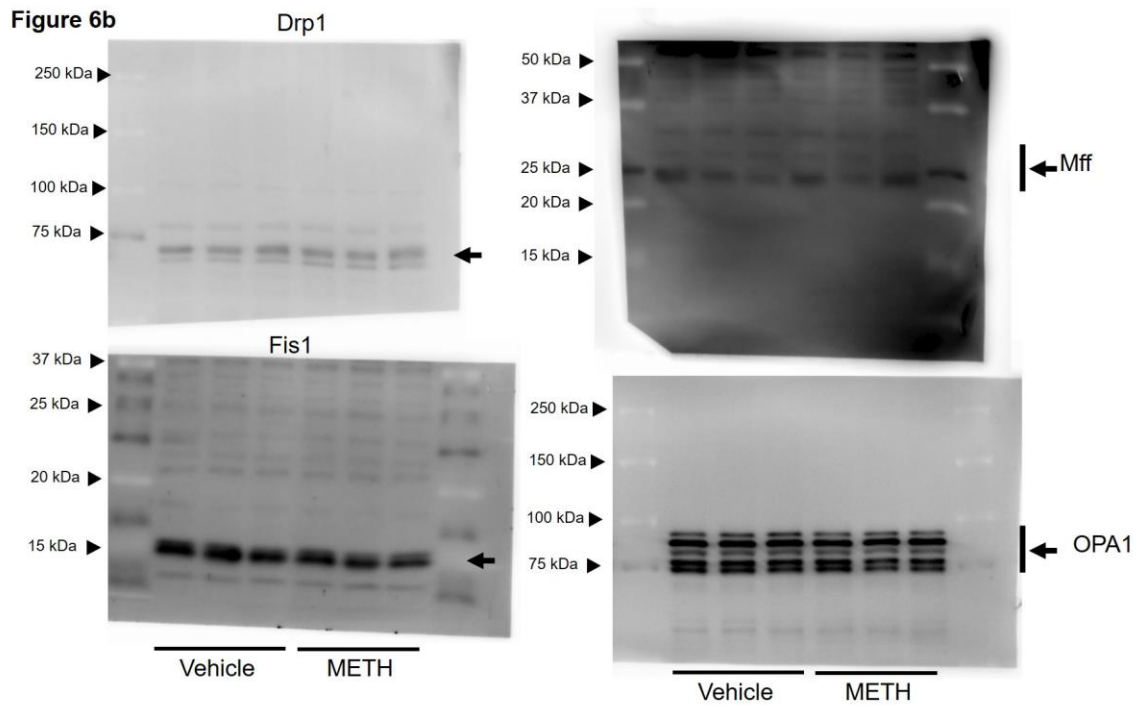

**Figure 6b**

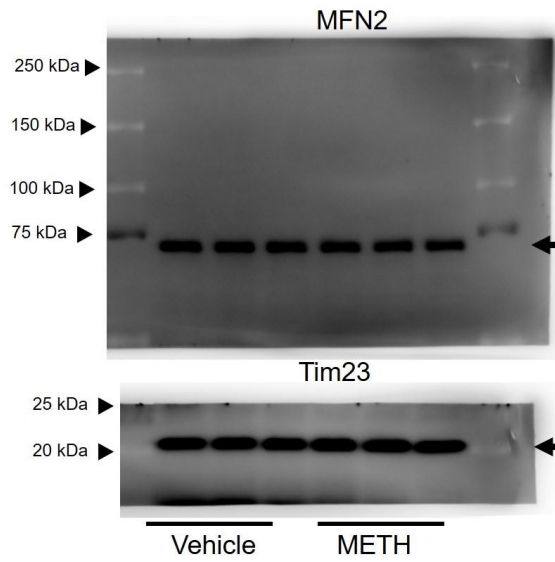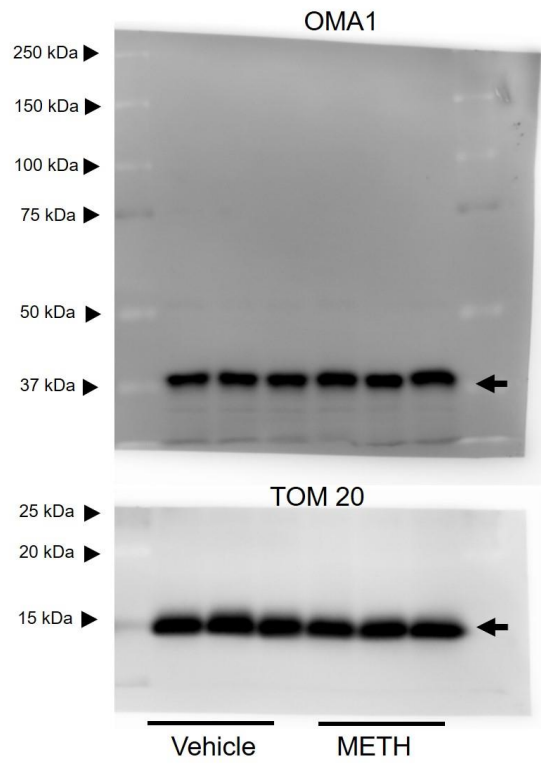

**Figure 6b**

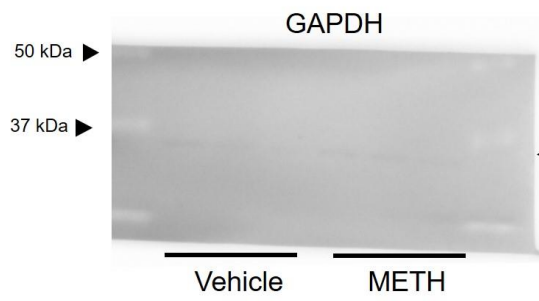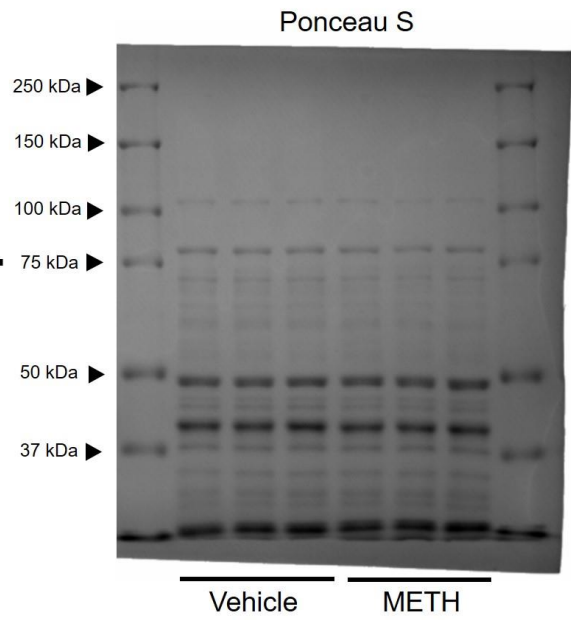

Figure 9c

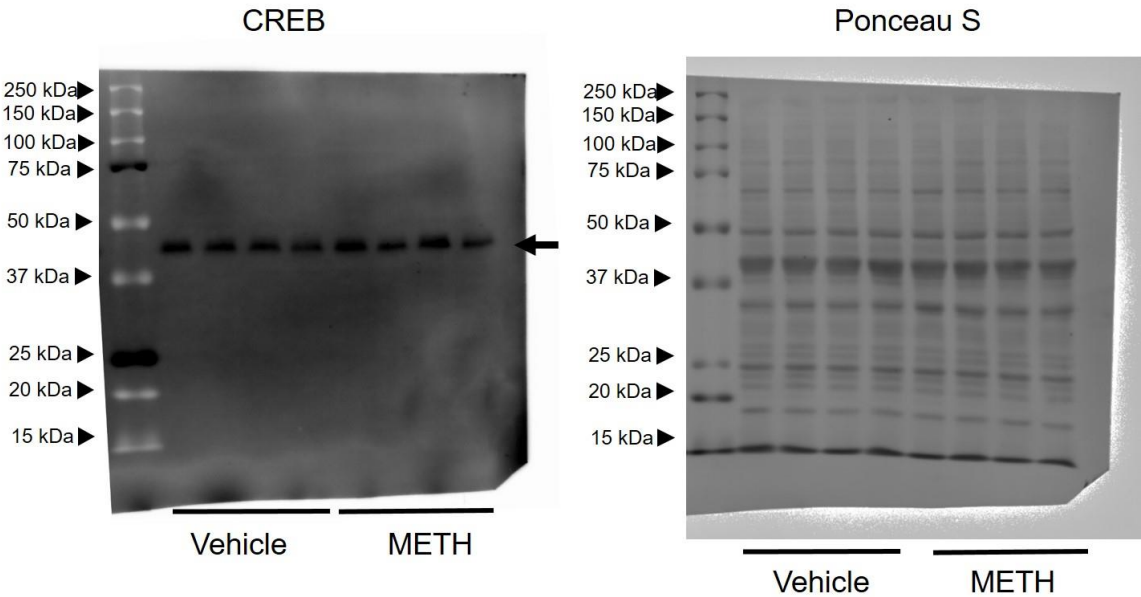

Figure 9c

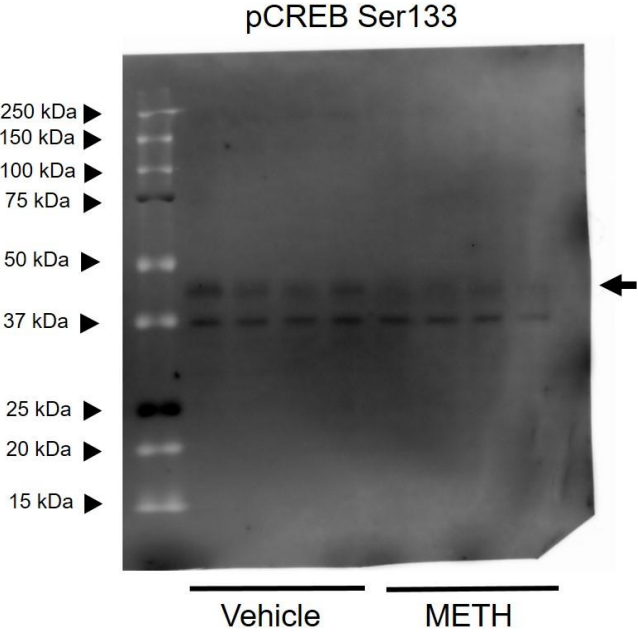



Figure 10d

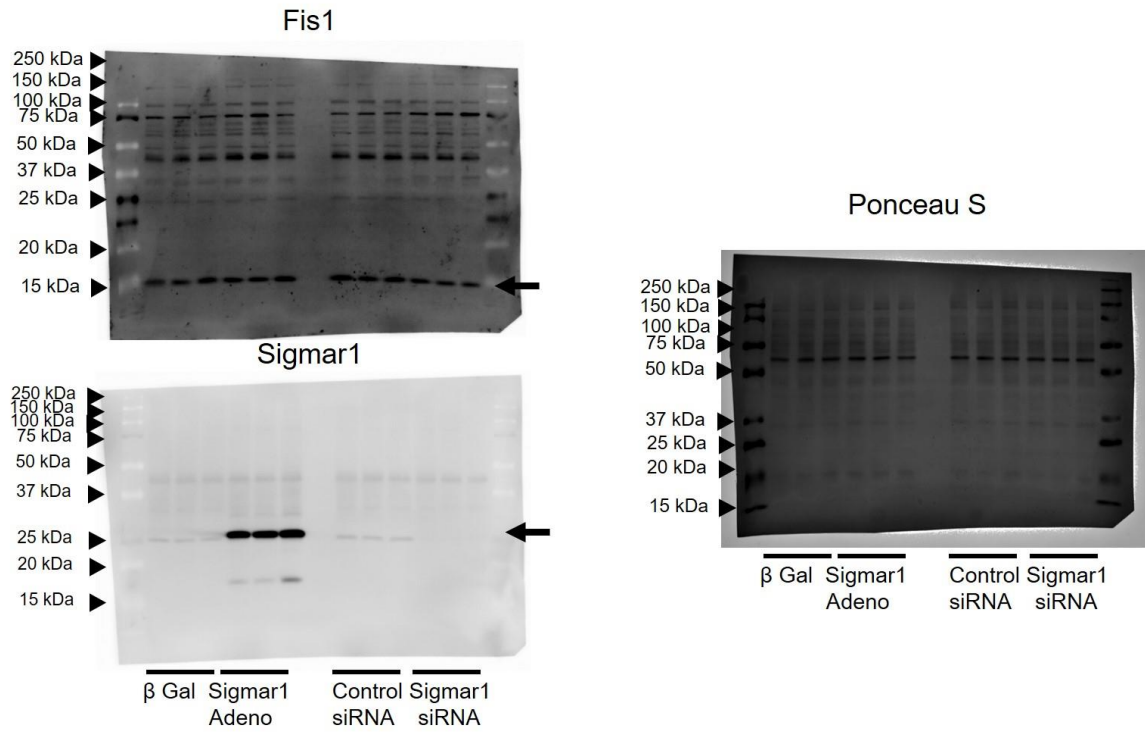

Supplementary Figure 5a

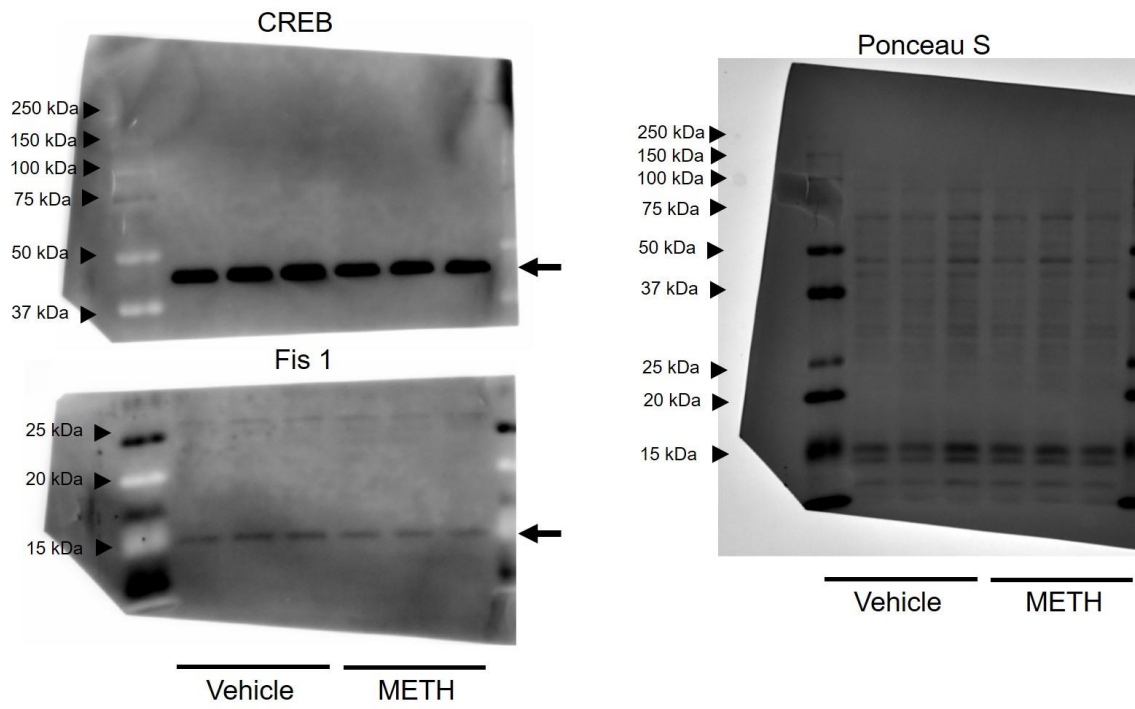

Supplement: 42003_2020_1408_MOESM1_ESM.pdf [file 42003_2020_1408_MOESM1_ESM.pdf]
